# Supplementary material for: New Organic–Inorganic Salt Based on Fluconazole Drug: TD-DFT Benchmark and Computational Insights into Halogen Substitution
Source: MDPI journal article supplement (doi:10.3390/ijms23158765), 2022-08-06
Supplement: s1 [file s1]

# Supplementary materials of New organic-inorganic salt based on fluconazole drug: TD-DFT Benchmark and computational insights into halogen substitution

Ferjani Hela, Rim bechaieb, M. Alshammari, O. M. Lemine, and Necmi Dege

**Corresponding Author:** Ferjani Hela

E-mail address: hhferjani@imamu.edu.sa

**Table S1**

Fractional atomic coordinates and isotropic or equivalent isotropic displacement parameters ( $\text{\AA}^2$ )

|            | <i>x</i>     | <i>y</i>     | <i>z</i>    | $U_{\text{iso}}^*/U_{\text{eq}}$ |
|------------|--------------|--------------|-------------|----------------------------------|
| <b>Sn1</b> | 1.18781 (3)  | 0.14677 (2)  | 0.47919 (2) | 0.03890 (8)                      |
| <b>Cl6</b> | 1.25999 (11) | 0.08587 (3)  | 0.63572 (9) | 0.05174 (19)                     |
| <b>Cl1</b> | 1.01125 (11) | 0.18582 (3)  | 0.60870 (9) | 0.0543 (2)                       |
| <b>Cl4</b> | 1.35721 (11) | 0.10812 (3)  | 0.33621 (8) | 0.0534 (2)                       |
| <b>Cl2</b> | 1.43827 (10) | 0.18700 (3)  | 0.58938 (9) | 0.05293 (19)                     |
| <b>Cl5</b> | 0.94373 (11) | 0.10427 (3)  | 0.37042 (9) | 0.0559 (2)                       |
| <b>Cl3</b> | 1.13177 (14) | 0.20755 (3)  | 0.31815 (9) | 0.0637 (2)                       |
| <b>F2</b>  | 0.5046 (2)   | 0.46091 (7)  | 0.5909 (2)  | 0.0590 (5)                       |
| <b>O1</b>  | 0.2655 (3)   | 0.35109 (7)  | 0.3613 (2)  | 0.0472 (5)                       |
| <b>N1</b>  | 0.3370 (3)   | 0.42854 (8)  | 0.2208 (3)  | 0.0403 (5)                       |
| <b>F1</b>  | −0.0055 (4)  | 0.49542 (9)  | 0.7217 (3)  | 0.0903 (9)                       |
| <b>N4</b>  | 0.5973 (3)   | 0.32775 (9)  | 0.4857 (3)  | 0.0452 (6)                       |
| <b>O2</b>  | 0.1788 (3)   | 0.29241 (8)  | 0.5450 (3)  | 0.0635 (7)                       |
| <b>O3</b>  | 0.6540 (3)   | 0.18062 (8)  | 0.3026 (3)  | 0.0667 (7)                       |
| <b>N2</b>  | 0.3685 (4)   | 0.47119 (9)  | 0.1776 (3)  | 0.0535 (7)                       |
| <b>N6</b>  | 0.6745 (4)   | 0.26532 (11) | 0.4142 (3)  | 0.0560 (7)                       |
| <b>N3</b>  | 0.1518 (4)   | 0.44026 (11) | 0.0493 (3)  | 0.0546 (7)                       |
| <b>C6</b>  | 0.2626 (4)   | 0.41760 (10) | 0.5007 (3)  | 0.0407 (6)                       |
| <b>N5</b>  | 0.7466 (4)   | 0.33679 (12) | 0.4459 (3)  | 0.0595 (7)                       |
| <b>C5</b>  | 0.3360 (4)   | 0.45267 (10) | 0.5814 (3)  | 0.0448 (7)                       |
| <b>C12</b> | 0.5553 (5)   | 0.28516 (12) | 0.4662 (4)  | 0.0559 (8)                       |
| <b>C7</b>  | 0.3672 (4)   | 0.38537 (10) | 0.4320 (3)  | 0.0402 (6)                       |
| <b>C11</b> | 0.5036 (4)   | 0.36322 (10) | 0.5391 (3)  | 0.0450 (7)                       |
| <b>C8</b>  | 0.4543 (4)   | 0.40911 (11) | 0.3319 (3)  | 0.0436 (7)                       |
| <b>C4</b>  | 0.2512 (5)   | 0.47946 (11) | 0.6561 (4)  | 0.0533 (8)                       |
| <b>C1</b>  | 0.0900 (4)   | 0.41137 (11) | 0.4926 (4)  | 0.0484 (7)                       |
| <b>C3</b>  | 0.0815 (5)   | 0.47052 (12) | 0.6457 (4)  | 0.0594 (9)                       |
| <b>C9</b>  | 0.2087 (4)   | 0.41008 (12) | 0.1430 (4)  | 0.0514 (7)                       |
| <b>H9</b>  | 0.164965     | 0.381162     | 0.151257    | 0.062*                           |

|            |             |              |            |            |
|------------|-------------|--------------|------------|------------|
| <b>C13</b> | 0.7876 (4)  | 0.29782 (14) | 0.4028 (4) | 0.0617 (9) |
| <b>H13</b> | 0.884670    | 0.292939     | 0.367820   | 0.074*     |
| <b>C10</b> | 0.2530 (5)  | 0.47684 (13) | 0.0732 (4) | 0.0592 (9) |
| <b>H10</b> | 0.241459    | 0.502925     | 0.021367   | 0.071*     |
| <b>C2</b>  | −0.0018 (5) | 0.43763 (12) | 0.5654 (4) | 0.0588 (9) |

Atomic displacement parameters ( $\text{\AA}^2$ )

|            | <i>U11</i>   | <i>U22</i>   | <i>U33</i>   | <i>U12</i>   | <i>U13</i>  | <i>U23</i>   |
|------------|--------------|--------------|--------------|--------------|-------------|--------------|
| <b>Sn1</b> | 0.04669 (13) | 0.03443 (12) | 0.03599 (12) | −0.00020 (8) | 0.00889 (8) | 0.00013 (7)  |
| <b>Cl6</b> | 0.0634 (5)   | 0.0432 (4)   | 0.0522 (5)   | 0.0073 (3)   | 0.0200 (4)  | 0.0117 (3)   |
| <b>Cl1</b> | 0.0611 (5)   | 0.0537 (4)   | 0.0501 (5)   | 0.0112 (4)   | 0.0154 (4)  | −0.0059 (3)  |
| <b>Cl4</b> | 0.0574 (4)   | 0.0621 (5)   | 0.0435 (4)   | 0.0033 (4)   | 0.0166 (4)  | −0.0077 (3)  |
| <b>Cl2</b> | 0.0552 (4)   | 0.0473 (4)   | 0.0537 (5)   | −0.0094 (3)  | 0.0035 (4)  | −0.0009 (3)  |
| <b>Cl5</b> | 0.0534 (4)   | 0.0558 (5)   | 0.0573 (5)   | −0.0103 (4)  | 0.0077 (4)  | −0.0102 (4)  |
| <b>Cl3</b> | 0.1003 (7)   | 0.0460 (4)   | 0.0413 (4)   | 0.0004 (4)   | 0.0041 (4)  | 0.0080 (3)   |
| <b>F2</b>  | 0.0517 (10)  | 0.0549 (11)  | 0.0704 (14)  | −0.0165 (9)  | 0.0111 (9)  | −0.0154 (10) |
| <b>O1</b>  | 0.0577 (13)  | 0.0413 (12)  | 0.0417 (12)  | −0.0112 (9)  | 0.0073 (10) | −0.0032 (9)  |
| <b>N1</b>  | 0.0432 (12)  | 0.0411 (13)  | 0.0376 (13)  | −0.0027 (10) | 0.0099 (10) | 0.0000 (10)  |
| <b>F1</b>  | 0.1039 (18)  | 0.0678 (15)  | 0.118 (2)    | 0.0022 (13)  | 0.0691 (18) | −0.0207 (15) |
| <b>N4</b>  | 0.0491 (14)  | 0.0453 (14)  | 0.0416 (14)  | 0.0022 (11)  | 0.0097 (11) | 0.0041 (11)  |
| <b>O2</b>  | 0.0801 (17)  | 0.0470 (13)  | 0.0672 (17)  | −0.0070 (12) | 0.0238 (14) | 0.0006 (12)  |
| <b>O3</b>  | 0.0649 (15)  | 0.0568 (15)  | 0.083 (2)    | 0.0041 (12)  | 0.0257 (14) | 0.0036 (13)  |
| <b>N2</b>  | 0.0603 (16)  | 0.0411 (14)  | 0.0581 (18)  | −0.0023 (12) | 0.0089 (14) | 0.0068 (12)  |
| <b>N6</b>  | 0.0636 (18)  | 0.0497 (16)  | 0.0545 (18)  | 0.0105 (14)  | 0.0110 (14) | 0.0005 (13)  |
| <b>N3</b>  | 0.0513 (16)  | 0.0654 (19)  | 0.0448 (16)  | 0.0036 (14)  | 0.0031 (13) | 0.0060 (14)  |
| <b>C6</b>  | 0.0474 (15)  | 0.0373 (14)  | 0.0383 (15)  | −0.0037 (12) | 0.0102 (12) | 0.0011 (12)  |
| <b>N5</b>  | 0.0432 (14)  | 0.0671 (18)  | 0.068 (2)    | −0.0047 (14) | 0.0099 (14) | −0.0050 (16) |
| <b>C5</b>  | 0.0501 (16)  | 0.0391 (15)  | 0.0455 (17)  | −0.0058 (12) | 0.0101 (13) | 0.0042 (12)  |
| <b>C12</b> | 0.064 (2)    | 0.0450 (18)  | 0.062 (2)    | 0.0035 (15)  | 0.0200 (17) | 0.0076 (15)  |
| <b>C7</b>  | 0.0453 (15)  | 0.0376 (14)  | 0.0374 (15)  | −0.0050 (11) | 0.0074 (12) | −0.0018 (11) |
| <b>C11</b> | 0.0559 (17)  | 0.0419 (15)  | 0.0371 (16)  | 0.0025 (13)  | 0.0086 (14) | −0.0018 (12) |
| <b>C8</b>  | 0.0424 (15)  | 0.0494 (17)  | 0.0384 (16)  | −0.0042 (12) | 0.0066 (12) | 0.0023 (12)  |
| <b>C4</b>  | 0.072 (2)    | 0.0367 (16)  | 0.054 (2)    | −0.0064 (15) | 0.0190 (17) | −0.0054 (14) |
| <b>C1</b>  | 0.0500 (17)  | 0.0439 (16)  | 0.0523 (19)  | −0.0067 (13) | 0.0120 (14) | 0.0014 (14)  |
| <b>C3</b>  | 0.074 (2)    | 0.0447 (18)  | 0.069 (2)    | 0.0047 (16)  | 0.037 (2)   | 0.0013 (16)  |
| <b>C9</b>  | 0.0547 (18)  | 0.0519 (18)  | 0.0465 (18)  | −0.0080 (14) | 0.0067 (15) | 0.0003 (14)  |
| <b>C13</b> | 0.0476 (18)  | 0.074 (2)    | 0.063 (2)    | 0.0078 (17)  | 0.0090 (17) | −0.0067 (19) |
| <b>C10</b> | 0.064 (2)    | 0.0536 (19)  | 0.059 (2)    | 0.0090 (16)  | 0.0084 (18) | 0.0109 (16)  |
| <b>C2</b>  | 0.0530 (18)  | 0.055 (2)    | 0.074 (2)    | −0.0018 (16) | 0.0246 (18) | 0.0069 (18)  |

**Table S2**

Selected Bond Lengths ( $\text{\AA}$ ) and Bond Angles ( $^\circ$ ) for (H2Fluconazole)SnCl<sub>6</sub>·2H<sub>2</sub>O.

| Selected Bond lengths |                   |               |                  |
|-----------------------|-------------------|---------------|------------------|
| <b>Sn1-Cl6</b>        | <b>2.4090 (8)</b> | <b>N3-C9</b>  | <b>1.329 (5)</b> |
| <b>Sn1-Cl5</b>        | 2.4156 (8)        | <b>N3-C10</b> | 1.343 (5)        |
| <b>Sn1-Cl1</b>        | 2.4161 (8)        | <b>C6-C1</b>  | 1.386 (4)        |
| <b>Sn1-Cl2</b>        | 2.4242 (8)        | <b>C6-C5</b>  | 1.386 (4)        |
| <b>Sn1-Cl3</b>        | 2.4251 (9)        | <b>C6-C7</b>  | 1.527 (4)        |
| <b>Sn1-Cl4</b>        | 2.4669 (8)        | <b>N5-C13</b> | 1.295 (5)        |
| <b>F2-C5</b>          | 1.360 (4)         | <b>C5-C4</b>  | 1.371 (5)        |
| <b>O1-C7</b>          | 1.411 (4)         | <b>C7-C8</b>  | 1.523 (4)        |
| <b>O1-H1</b>          | 0.8200            | <b>C7-C11</b> | 1.546 (4)        |
| <b>N1-C9</b>          | 1.300 (4)         | <b>N2-C10</b> | 1.294 (5)        |
| <b>N1-N2</b>          | 1.371 (4)         | <b>N6-C12</b> | 1.320 (5)        |
| <b>N1-C8</b>          | 1.457 (4)         | <b>N6-C13</b> | 1.339 (5)        |
| <b>F1-C3</b>          | 1.360 (4)         | <b>C4-C3</b>  | 1.372 (5)        |
| <b>N4-C12</b>         | 1.302 (4)         | <b>C1-C2</b>  | 1.384 (5)        |
| <b>N4-N5</b>          | 1.366 (4)         | <b>C3-C2</b>  | 1.364 (6)        |
| <b>N4-C11</b>         | 1.455 (4)         |               |                  |

| Selected Bond Angles |                  |                  |                  |
|----------------------|------------------|------------------|------------------|
| <b>Cl6-Sn1-Cl5</b>   | <b>89.94 (3)</b> | <b>O1-C7-C8</b>  | <b>105.7 (2)</b> |
| <b>Cl6-Sn1-Cl1</b>   | 94.21 (3)        | <b>O1-C7-C6</b>  | 111.6 (2)        |
| <b>Cl5-Sn1-Cl1</b>   | 89.64 (3)        | <b>C8-C7-C6</b>  | 113.2 (2)        |
| <b>Cl6-Sn1-Cl2</b>   | 88.53 (3)        | <b>O1-C7-C11</b> | 109.4 (2)        |
| <b>Cl5-Sn1-Cl2</b>   | 178.03 (3)       | <b>C8-C7-C11</b> | 109.0 (2)        |
| <b>Cl1-Sn1-Cl2</b>   | 91.72 (3)        | <b>C6-C7-C11</b> | 107.8 (2)        |
| <b>Cl6-Sn1-Cl3</b>   | 176.56 (3)       | <b>N4-C11-C7</b> | 112.2 (3)        |
| <b>Cl5-Sn1-Cl3</b>   | 91.89 (3)        | <b>N1-C8-C7</b>  | 113.8 (2)        |
| <b>Cl1-Sn1-Cl3</b>   | 88.72 (3)        | <b>C5-C4-C3</b>  | 116.0 (3)        |
| <b>Cl2-Sn1-Cl3</b>   | 89.58 (3)        | <b>C2-C1-C6</b>  | 121.6 (3)        |
| <b>Cl6-Sn1-Cl4</b>   | 88.26 (3)        | <b>F1-C3-C2</b>  | 119.1 (3)        |
| <b>Cl5-Sn1-Cl4</b>   | 88.52 (3)        | <b>F1-C3-C4</b>  | 117.6 (4)        |
| <b>Cl1-Sn1-Cl4</b>   | 176.92 (3)       | <b>C2-C3-C4</b>  | 123.3 (3)        |
| <b>Cl2-Sn1-Cl4</b>   | 90.18 (3)        | <b>N1-C9-N3</b>  | 107.2 (3)        |
| <b>Cl3-Sn1-Cl4</b>   | 88.87 (3)        | <b>C1-C6-C7</b>  | 121.5 (3)        |
| <b>C9-N1-N2</b>      | 110.7 (3)        | <b>C5-C6-C7</b>  | 122.2 (3)        |
| <b>C9-N1-C8</b>      | 130.0 (3)        | <b>C13-N5-N4</b> | 103.1 (3)        |
| <b>N2-N1-C8</b>      | 118.9 (2)        | <b>F2-C5-C4</b>  | 116.8 (3)        |
| <b>C12-N4-N5</b>     | 110.9 (3)        | <b>F2-C5-C6</b>  | 118.7 (3)        |
| <b>C12-N4-C11</b>    | 127.6 (3)        | <b>C4-C5-C6</b>  | 124.5 (3)        |
| <b>N5-N4-C11</b>     | 121.5 (3)        | <b>N4-C12-N6</b> | 107.5 (3)        |
| <b>C10-N2-N1</b>     | 104.0 (3)        | <b>N5-C13-N6</b> | 112.3 (3)        |
| <b>C12-N6-C13</b>    | 106.1 (3)        | <b>N2-C10-N3</b> | 111.4 (3)        |
| <b>C9-N3-C10</b>     | 106.7 (3)        | <b>C3-C2-C1</b>  | 118.4 (3)        |
| <b>C1-C6-C5</b>      | 116.2 (3)        |                  |                  |

**Table S3:** Calculated UV-Vis spectrum, oscillator strength and the major contribution calculated using HSE1PBE functional.

| $\lambda_{\text{cal}}$ (nm) | Excitation energy (eV) | Oscillator strength | Major contributions                           |
|-----------------------------|------------------------|---------------------|-----------------------------------------------|
| 347.71                      | 3.5657                 | 0.0012              | H -->L (0.705150)                             |
| 238.23                      | 5.2043                 | 0.0265              | H-3 -->L+2 (0.60696)                          |
| 219.39                      | 5.6512                 | 0.0126              | H-10 -->L+2 (0.30488)<br>H-8 -->L+2 (0.45574) |

**Table S4:** Theoretical and experimental equilibrium geometry of the (H2Fluconazole).SnCl<sub>6</sub>.2H<sub>2</sub>O

|        | HSE1PBE | Exp    | Error % |
|--------|---------|--------|---------|
| Sn-Cl4 | 2.5692  | 2.4669 | 3.98%   |
| Sn-Cl2 | 2.3656  | 2.4090 | 1.83%   |
| O1-H1  | 0.9803  | 0.8200 | 16.3%   |
| N1-N2  | 1.3563  | 1.371  | 1.08%   |
| F1-C3  | 1.3384  | 1.360  | 1.61%   |
| C5-F2  | 1.3557  | 1.360  | 0.31%   |
| C5-C4  | 1.3872  | 1.371  | 1.16%   |

xyz coordinates of the optimized geometries using HSEH1PBE functional

|    |           |           |           |
|----|-----------|-----------|-----------|
| Sn | 1.960313  | 5.381978  | 5.153225  |
| Cl | 1.518408  | 3.356576  | 6.588149  |
| Cl | 1.418836  | 6.745826  | 7.171278  |
| Cl | 2.742911  | 3.779412  | 3.386555  |
| Cl | 4.371846  | 5.362417  | 6.039703  |
| Cl | -0.261855 | 5.381152  | 4.341681  |
| Cl | 2.683917  | 7.333745  | 3.907815  |
| F  | 6.523035  | 1.558048  | 10.584922 |
| O  | 3.260131  | 3.808861  | 9.039252  |
| H  | 2.830469  | 3.504626  | 8.212299  |
| N  | 4.571382  | 1.997279  | 7.157952  |
| F  | 3.486012  | -1.094141 | 12.944765 |
| N  | 5.365865  | 5.517215  | 9.438756  |
| N  | 3.788255  | 0.944088  | 7.500221  |
| N  | 5.029543  | 7.335366  | 8.370605  |
| N  | 3.677026  | 1.344376  | 5.349575  |

|   |          |           |           |
|---|----------|-----------|-----------|
| C | 4.211995 | 2.011113  | 10.331782 |
| N | 6.597805 | 5.976631  | 9.109105  |
| C | 5.237250 | 1.261030  | 10.895264 |
| C | 4.417727 | 6.324632  | 8.979023  |
| H | 3.351790 | 6.165965  | 9.042587  |
| C | 4.457623 | 3.182265  | 9.376129  |
| C | 5.221103 | 4.267636  | 10.174629 |
| H | 6.226799 | 3.954803  | 10.450099 |
| H | 4.645342 | 4.463290  | 11.080544 |
| C | 5.308746 | 2.773944  | 8.148170  |
| H | 6.178231 | 2.201969  | 8.472032  |
| H | 5.636192 | 3.670281  | 7.618926  |
| C | 5.028221 | 0.213048  | 11.769851 |
| H | 5.858473 | -0.346315 | 12.181472 |
| C | 2.913260 | 1.675902  | 10.710749 |
| H | 2.096753 | 2.254120  | 10.295837 |
| C | 3.718047 | -0.083125 | 12.098904 |
| C | 4.510130 | 2.248472  | 5.860587  |
| H | 5.043332 | 3.005731  | 5.284428  |
| C | 6.359518 | 7.076802  | 8.451467  |
| H | 7.124055 | 7.705888  | 8.024705  |
| C | 3.231404 | 0.580690  | 6.384009  |
| H | 2.511583 | -0.215383 | 6.286428  |
| C | 2.651446 | 0.633264  | 11.587499 |
| H | 1.639578 | 0.374515  | 11.873845 |
| H | 4.528645 | 8.025196  | 7.708979  |
| H | 3.284515 | 1.438681  | 4.416198  |
| O | 3.687633 | 8.843074  | 6.697002  |
| H | 2.780032 | 8.524134  | 6.853829  |
| H | 3.824752 | 8.588690  | 5.771231  |
| O | 5.955920 | 3.855161  | 3.700695  |
| H | 6.025414 | 4.725151  | 4.106941  |
| H | 5.123334 | 3.922262  | 3.211736  |

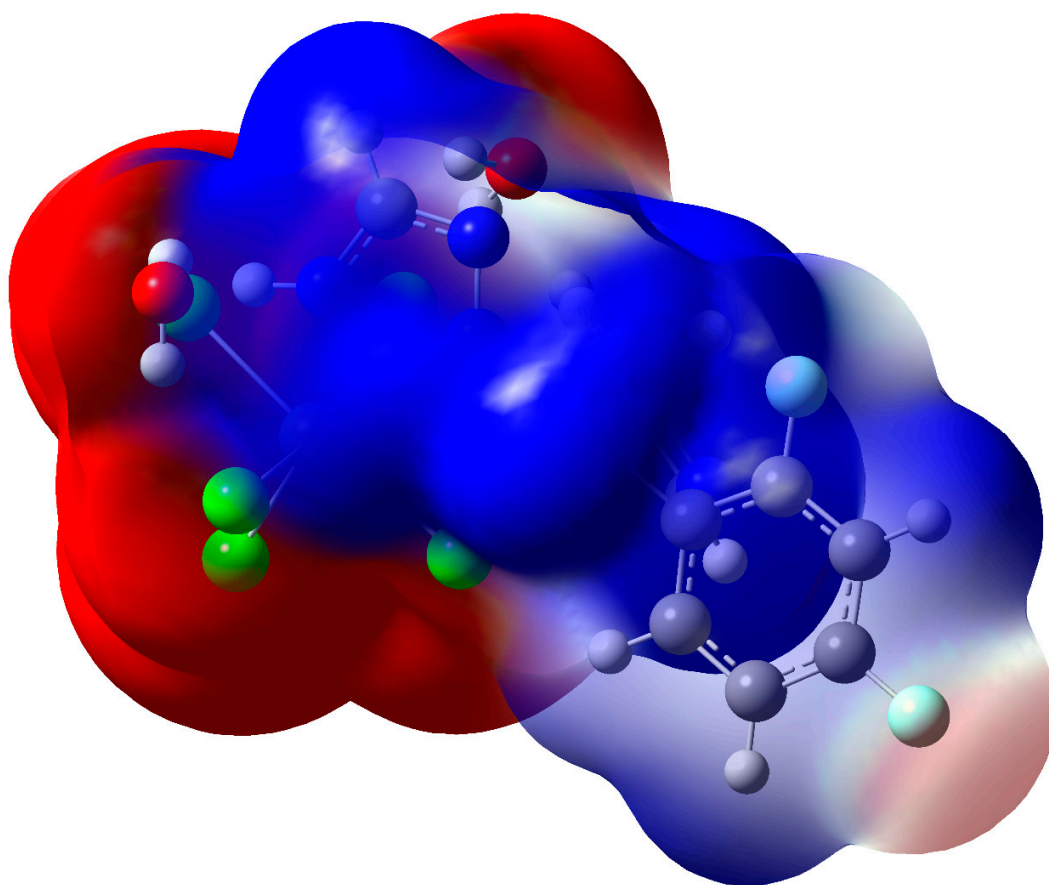

**Figure S1:** The electrostatic potential map of the (H2Fluconazole).SnCl<sub>6</sub>.2H<sub>2</sub>O

### 2.3.2. SnCl<sub>6</sub> internal modes

The Raman spectrum (Figure 6b) shows a weak band at 314 cm<sup>-1</sup> is assigned to the (Sn-Cl) asymmetric stretching ( $\nu_1$ (Sn-Cl)). The symmetric stretching ( $\nu_2$ (Sn-Cl)) vibration and the bending vibration in the  $\nu_5$ (Cl-Sn-Cl) plane are overlapped with other vibrations. The weak bands located at 171, 155 and 128 cm<sup>-1</sup> in the Raman spectrum are attributed to the bending vibrations of (Cl-Sn-Cl) planes.

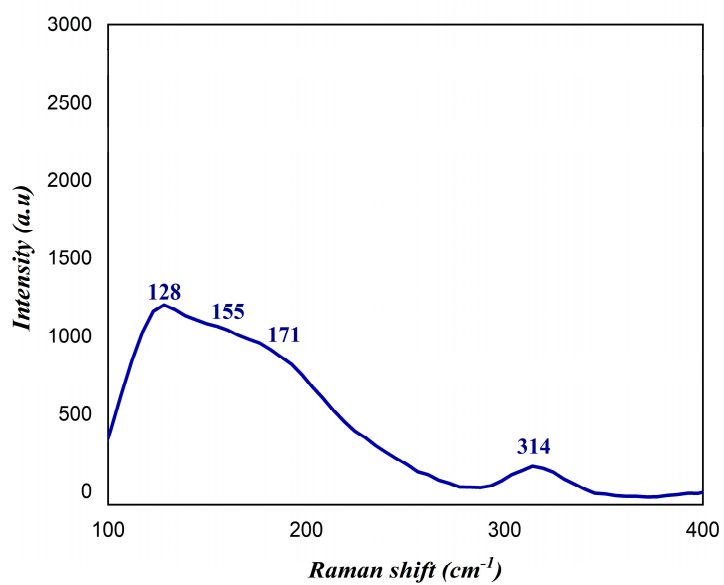

**Figure S2.** Raman spectrum of (H<sub>2</sub>Fluconazole).SnCl<sub>6</sub>.2H<sub>2</sub>O at room temperature.
